# Supplementary material for: Mutualistic Polydnaviruses Share Essential Replication Gene Functions with Pathogenic Ancestors
Source: PubMed Central journal article supplement (PMC3649998; doi:10.1371/journal.ppat.1003348), 2013-05-09
Supplement: ppat.1003348.s001.pdf [file ppat.1003348.s001.pdf]

**Table S1. BV conserved gene-related proteins detected in MdBV virions.** Conserved gene names and locus identifier in the *M. demolitor* ovary transcriptome are listed to the left. Number of unique peptides from the two proteomic replicates are indicated in the middle columns relative to transcript abundance for each gene that was previously determined as reads per kilobase per million reads mapped (RPKM).

| Gene name                    | Locus                           | Number of unique peptides replicate 1 | Number of unique peptides replicate 2 | Adult ovary mean RPKM |
|------------------------------|---------------------------------|---------------------------------------|---------------------------------------|-----------------------|
| <i>helicase</i>              | 3891                            |                                       |                                       | 29                    |
| <i>int-1</i>                 | 3978                            | 2                                     | 4                                     | 53                    |
| <i>int-2</i>                 | 1667                            |                                       |                                       | 48                    |
| <i>p47</i>                   | 703                             |                                       |                                       | 128                   |
| <i>lef-4</i>                 | 2025                            |                                       |                                       | 36                    |
| <i>lef-8</i>                 | <i>lef-8</i>                    |                                       |                                       | 283                   |
| <i>lef-9</i>                 | 3218                            |                                       |                                       | 72                    |
| <i>lef-5</i>                 | 539 transcripts<br>2,7,8,9      |                                       |                                       | 159                   |
| <i>vlf-1</i>                 | 539 transcripts<br>1,3,4,5,6,10 |                                       | 2                                     | 144                   |
| <i>HzNVorf140 (vlf-1b)</i>   | 3488                            |                                       | 2                                     | 88                    |
| <i>HzNVorf140 (vlf-1b-2)</i> | 2965+2966                       | 2                                     | 11                                    | 358                   |
| <i>38K</i>                   | 318                             | 6                                     | 18                                    | 511                   |
| <i>vp91</i>                  | 4098                            | 2                                     | 8                                     | 210                   |
| <i>vp39</i>                  | <i>vp39</i>                     | 19                                    | 27                                    | 4109                  |
| <i>p74</i>                   | <i>p74</i>                      | 13                                    | 22                                    | 1320                  |
| <i>pif-1</i>                 | <i>pif-1</i>                    | 14                                    | 17                                    | 382                   |
| <i>pif-2</i>                 | 226                             | 6                                     | 19                                    | 448                   |
| <i>pif-3</i>                 | 767                             | 2                                     | 6                                     | 150                   |
| <i>19 kDa</i>                | 1791                            | 7                                     | 3                                     | 597                   |
| <i>odv-e56</i>               | 13843                           |                                       |                                       | 5                     |
| <i>odv-e56</i>               | 1447                            | 4                                     | 5                                     | 329                   |
| <i>odv-e56</i>               | 1083                            | 10                                    | 15                                    | 217                   |
| <i>odv-e66</i>               | 175                             | 8                                     |                                       | 405                   |
| <i>odv-e66</i>               | 1139                            | 3                                     | 5                                     | 91                    |

|                                 |                       |    |    |      |
|---------------------------------|-----------------------|----|----|------|
| <i>odv-e66</i>                  | 2331                  | 23 | 16 | 197  |
| <i>odv-e66</i>                  | 4186                  | 18 | 27 | 207  |
| <i>odv-e66</i>                  | 2730                  | 21 | 24 | 244  |
| <i>HzNVorf9-1</i>               | <i>HzNVorf9-1</i>     | 10 | 16 | 864  |
| <i>HzNVorf9-2</i>               | <i>HzNVorf9-2</i>     | 7  | 14 | 761  |
| <i>HzNVorf106</i>               | 332                   | 4  | 8  | 508  |
| <i>PmV hypothetical protein</i> | 756                   | 4  | 12 | 546  |
| <i>ac92</i>                     | 5801                  | 1  | 4  | 95   |
| <i>ac92</i>                     | 2756                  | 5  |    | 162  |
| <i>HzNVorf64</i>                | <i>HzNVorf64</i>      | 3  | 4  | 1043 |
| <i>HzNVorf94</i>                | 318                   | 6  | 18 | 511  |
| <i>HzNVorf128</i>               | 1167                  |    |    | 107  |
| 17a                             |                       | 2  | 4  | 2309 |
| 27b                             | 2287                  | 5  | 11 | 1823 |
| 30b                             | 1266                  |    |    | 210  |
| 35a                             | 417                   | 20 | 20 | 129  |
| 35a                             | 420                   | 30 | 36 | 249  |
| 35a                             | 615 (transcript 4, 9) |    |    | 277  |
| 97a                             | 576                   | 28 | 30 | 334  |
| 97b                             | 937                   |    |    | 309  |
