# Supplementary material for: Mutualistic Polydnaviruses Share Essential Replication Gene Functions with Pathogenic Ancestors
Source: PubMed Central journal article supplement (PMC3649998; doi:10.1371/journal.ppat.1003348), 2013-05-09
Supplement: ppat.1003348.s002.pdf [file ppat.1003348.s002.pdf]

**Table S2. Primers used for dsRNA synthesis template amplification, qPCR assays of expression or segment abundance, and protein expression.**

| Target                         | Accession numbers         | Primer name        | Sequence 5'-3'                                |
|--------------------------------|---------------------------|--------------------|-----------------------------------------------|
| <b>dsRNA synthesis primers</b> |                           |                    |                                               |
| <i>lef-9</i>                   | JO947537.1-<br>JO947542.1 | Mdlef9RN<br>AiF    | TAATACGACTCACTATAGGGGTCGTCCGTATAACATTGGT      |
|                                |                           | Mdlef9RN<br>AiR    | TAATACGACTCACTATAGGGTGGATTTATCAAATCGAAGC      |
| <i>lef-4</i>                   | JO932223.1-<br>JO932224.1 | Mdlef4RN<br>AiF    | TAATACGACTCACTATAGGGATGTTTCATACCCCTCACCAG     |
|                                |                           | Mdlef4RN<br>AiR    | TAATACGACTCACTATAGGGACGGCAGGGTATGTTTAGTA      |
| <i>vp39</i>                    | JR139428.1-<br>JR139430.1 | vp39_RNA<br>iF     | TAATACGACTCACTATAGGGCGGCATCATGCAGTTGTATC      |
|                                |                           | vp39_RNA<br>iR     | TAATACGACTCACTATAGGGATTTGCTGCTTGAGGGTTG       |
| <i>vlf-1</i>                   | JO963955.1                | vlf1_RNAi<br>F     | TAATACGACTCACTATAGGGTTCGGTGTTCGTCCGTATT       |
|                                |                           | vlf1_RNAi<br>R     | TAATACGACTCACTATAGGGACGGAATTTACGCCACCATA      |
| <i>vlf-1 #2</i>                | JO963955.1                | vlf-<br>IRNAi2F    | TAATACGACTCACTATAGGGAACATGACGGACGCATTAAG      |
|                                |                           | vlf-<br>IRNAi2R    | TAATACGACTCACTATAGGGGAAATCATTGGATACTGATTTTGAA |
| <i>int-1</i>                   | JO956053.1                | Int_RNAiF          | TAATACGACTCACTATAGGGTCTTCCAACACACGATTCCA      |
|                                |                           | Int_RNAi<br>R      | TAATACGACTCACTATAGGGTTTTGGTTTCATCAGCAATAAAGC  |
| <i>p74</i>                     | JO979915.1                | Mdp74RN<br>AiF     | TAATACGACTCACTATAGGGCCCCACATAATCTCACATCT      |
|                                |                           | Mdp74RN<br>AiR     | TAATACGACTCACTATAGGGTCTTTTGATCACCCTTCTT       |
| <i>pif-1</i>                   | JO979916.1                | pif-<br>IRNAiF     | TAATACGACTCACTATAGGGATTTATCTGCGACGGTGAGG      |
|                                |                           | pif-<br>IRNAiR     | TAATACGACTCACTATAGGGTAATTGCCTTCTTGGGTGG       |
| <i>eGFP</i>                    |                           | T7pGEM-<br>Forward | TAATACGACTCACTATAGGGCACGACGTTGTAAAACGAC       |
|                                |                           | T7pGEM-<br>Reverse | TAATACGACTCACTATAGGGGATAACAATTCACACAGG        |
| <b>qPCR primers</b>            |                           |                    |                                               |
| <i>lef-9</i>                   | JO947537.1-<br>JO947542.1 | lef9qPCR<br>F*     | CATCTTGATCAGCGTGCAAT                          |
|                                |                           | lef9qPCR<br>R*     | ACGTCAGTATTCCCCAGCAC                          |
| <i>lef-4</i>                   | JO932223.1-<br>JO932224.1 | lef4qPCR<br>F*     | ACCCTTACCAGGACAACCTG                          |
|                                |                           | lef4qPCR<br>R*     | AAATAGTACGCGCCACCTTG                          |
| <i>vp39</i>                    | JR139428.1-<br>JR139430.1 | vp39qPCR<br>F      | CGCTACACGCTATCGATTTG                          |
|                                |                           | vp39qPCR<br>R      | CACTGACTGTGCACAAAATTCA                        |
| <i>vlf-1</i>                   | JO963955.1                | vlf1_qPCR<br>F     | TTTAAAGCCCAAAGCCACAG                          |
|                                |                           | vlf1_qPCR<br>R     | AATGGCTTAAAGTCGGGATG                          |
| <i>int-1</i>                   | JO956053.1                | IntqPCR<br>F       | GCGCAGCAGCTAAGTCATT                           |
|                                |                           | IntqPCR<br>R       | AAAATATCGACGCACGGGTA                          |
| <i>p74</i>                     | JO979915.1                | p74F*              | TCCGTAATTGATTTGGGGAGA                         |
|                                |                           | p74R*              | TGCAGCACCAACAACAAT                            |
| <i>pif-1</i>                   | JO979916.1                | pif-<br>lqPCR<br>F | CTGCAAGTCGTGTCCCTACA                          |
|                                |                           | pif-<br>lqPCR<br>R | ATAACCAATCGCCGTGATA                           |

|              |                           |          |                                          |
|--------------|---------------------------|----------|------------------------------------------|
|              |                           | IqPCR    |                                          |
| Segment B    | AY848690.1                | SegBLL*  | CGTGGATTGACAACGCGTTT                     |
|              |                           | SegBRR*  | TTCTTAGCAGATGATGTCATCGC                  |
|              |                           | SegBRL*  | AGCTTATGTCGACAAGCGCT                     |
|              |                           | SegBLR2* | TGATTAATTTGTGATACTTCCATGTT               |
| <i>lef-9</i> | JO947537.1-<br>JO947542.1 | LEF-9F2  | GACGACGACAAGATGTCAATTTTCAACCACTTTATTG    |
|              |                           | LEF-9R   | GAGGAGAAGCCCGTTTCAATATTCGGACGAATCTAAATCC |

\*Primer sequences have been previously published in:  
 Burke GR, Strand MR (2012) Deep sequencing identifies viral and wasp genes with potential roles in replication of *Microplitis demolitor* Bracovirus. J Virol 86: 3293-3306.
