# Supplementary material for: Mutualistic Polydnaviruses Share Essential Replication Gene Functions with Pathogenic Ancestors
Source: PubMed Central journal article supplement (PMC3649998; doi:10.1371/journal.ppat.1003348), 2013-05-09

*vlf-1* copies / ng total RNA

$F_{3,8}=19.1, p=0.0005$

**A**

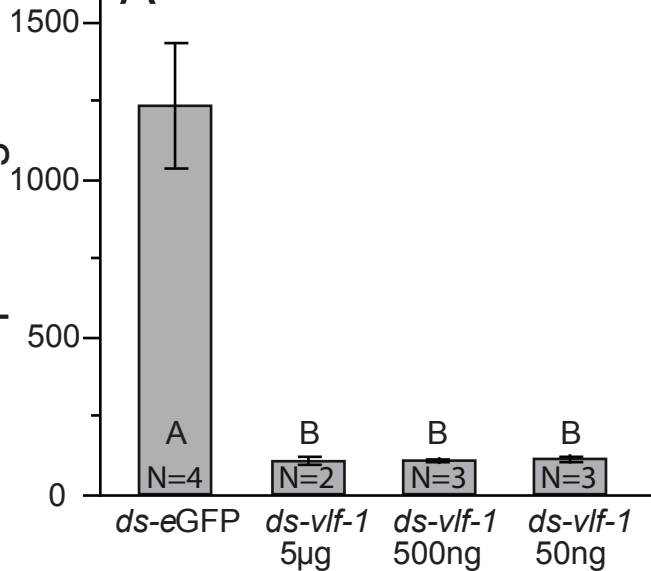

% inhibition

**B**

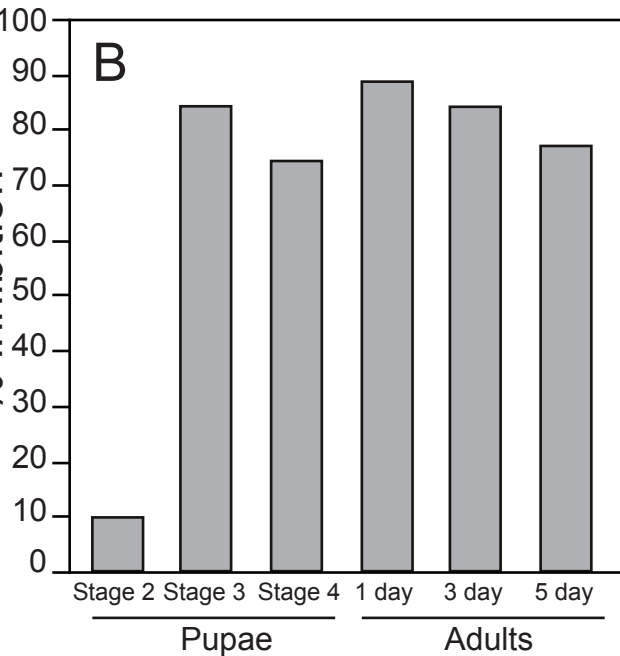

Supplement: ppat.1003348.s003.pdf [file ppat.1003348.s003.pdf]
