# Supplementary material for: Mutualistic Polydnaviruses Share Essential Replication Gene Functions with Pathogenic Ancestors
Source: PubMed Central journal article supplement (PMC3649998; doi:10.1371/journal.ppat.1003348), 2013-05-09

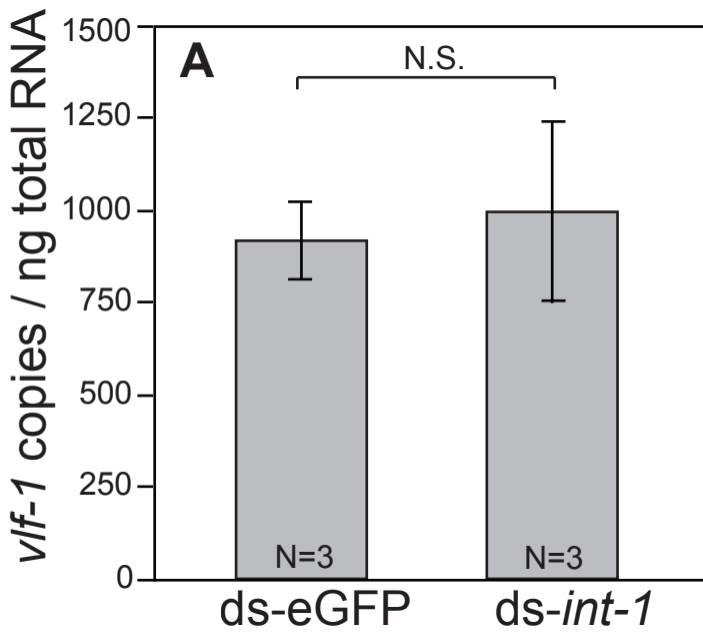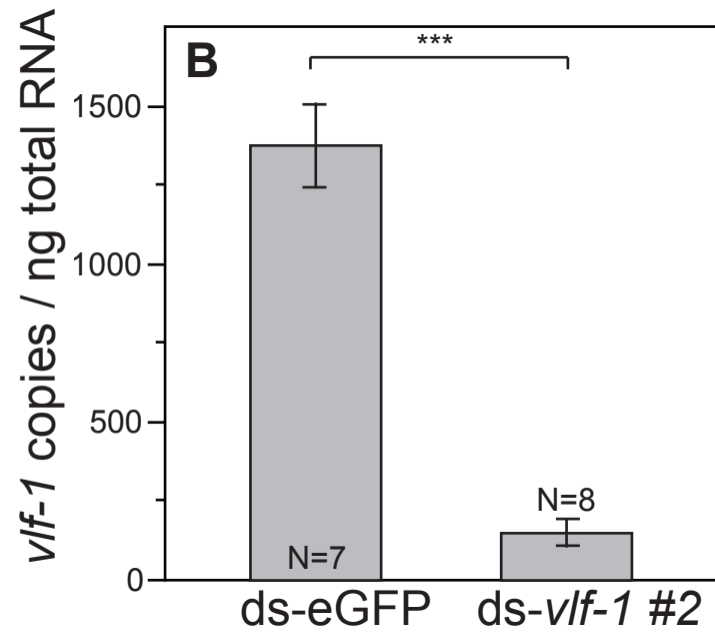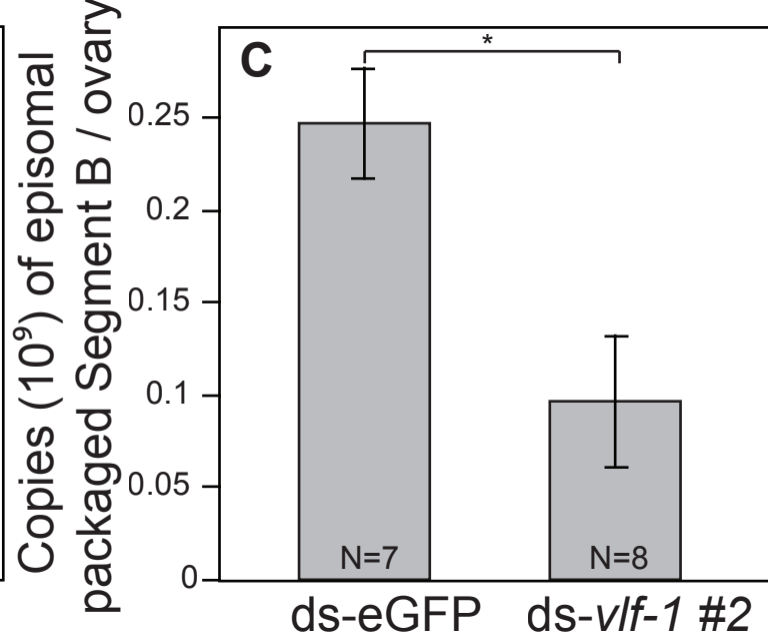

Supplement: ppat.1003348.s004.pdf [file ppat.1003348.s004.pdf]
